# Supplementary material for: Long term follow-up to evaluate the efficacy of miglustat treatment in Italian patients with Niemann-Pick disease type C
Source: Springer Nature journal article supplement (doi:10.1186/s13023-015-0240-y), 2015-02-26
Supplement: MOESM1 [file 9776058]

**Additional file 1. Patients' phenotype and genotype, duration of miglustat treatment and follow-up, latency between onset of neurological manifestations and start of treatment.**

| Patient code | Sex | Phenotype | Gene | Genotype                 |                          | Age at enrollment | Duration of previous miglustat therapy at enrollment (months) | Duration of miglustat exposure (months) | Age at onset of neurological symptoms (years) | Age at onset of visceral symptoms (years) | Age at onset of psychiatric symptoms (years) | Age at diagnosis (years) | Age at start of treatment (years) | Latency between onset of neurological symptoms and start of treatment (years) |
|--------------|-----|-----------|------|--------------------------|--------------------------|-------------------|---------------------------------------------------------------|-----------------------------------------|-----------------------------------------------|-------------------------------------------|----------------------------------------------|--------------------------|-----------------------------------|-------------------------------------------------------------------------------|
|              |     |           |      | allele 1                 | allele 2                 |                   |                                                               |                                         |                                               |                                           |                                              |                          |                                   |                                                                               |
| A01          | F   | A         | NPC1 | c.1907C>T (p.S636F)      | ND                       | 18.83             | 0                                                             | 60                                      | 16.00                                         |                                           | 16.00                                        | 18.00                    | 19.00                             | 3.00                                                                          |
| A02          | F   | A         | NPC1 | c.2932C>T (p.R978C)      | c.882-28A>G              | 29.90             | 23                                                            | 96                                      | 19.00                                         |                                           |                                              | 25.00                    | 28.00                             | 9.00                                                                          |
| A03          | M   | A         | NPC2 | c.26T>C (p.L9P)          | c.26T>C (p.L9P)          | 43.83             | 0                                                             | 60                                      | 33.00                                         | 39.00                                     |                                              | 43.83                    | 43.83                             | 11.00                                                                         |
| A10          | F   | A         | NPC1 | c.3019C>G (p.P1007A)     | c.3493G>A (p.V1165M)     | 28.83             | 0                                                             | 48                                      | 19.00                                         |                                           | 24.00                                        | 28.00                    | 28.83                             | 9.83                                                                          |
| A18          | F   | A         | NPC1 | C.1415T>A (p.L472H)      | C.3230G>A (p.R1077Q)     | 40.10             | 0                                                             | 48                                      | 26.00                                         |                                           |                                              | 29.66                    | 40.10                             | 5.80                                                                          |
| A19          | M   | A         | NPC1 | c.2932C>T (p.R978C)      | c.882-28A>G              | 33.75             | 23                                                            | 96                                      | 18.00                                         |                                           |                                              | 26.00                    | 31.80                             | 13.80                                                                         |
| J04          | F   | J         | NPC1 | c.3182 T >C (p.I1061T)   | c.3182 T >C (p.I1061T)   | 15.66             | 31                                                            | 96                                      | 6.00                                          |                                           |                                              | 7.70                     | 13.00                             | 7.00                                                                          |
| J06          | F   | J         | NPC1 | c.2762A>C (p.Q921P)      | c.2903A>G (p.N968S)      | 18.66             | 0                                                             | 60                                      | 8.00                                          |                                           |                                              | 12.50                    | 18.83                             | 10.83                                                                         |
| J07          | M   | J         | NPC1 | c.3182 T >C (p.I1061T)   | c.3182 T >C (p.I1061T)   | 19.60             | 31                                                            | 96                                      | 11.00                                         | 0.50                                      |                                              | 11.50                    | 19.60                             | 8.60                                                                          |
| J11          | M   | J         | NPC1 | c.3493G>A (p.V1165M )    | c.58-3T>G ( spl?)        | 17.83             | 7                                                             | 72                                      | 6.00                                          |                                           |                                              | 9.00                     | 17.25                             | 11.25                                                                         |
| J12          | F   | J         | NPC1 | c.2762A>C (p.Q921P)      | c.2903A>G (p.N968S)      | 13.33             | 0                                                             | 54                                      | 10.00                                         |                                           |                                              | 12.70                    | 13.25                             | 3.25                                                                          |
| J13          | F   | J         | NPC1 | c.2762A>C (p.Q921P)      | c.2903A>G (p.N968S)      | 16.66             | 0                                                             | 54                                      | 16.00                                         |                                           |                                              | 16.00                    | 16.60                             | 0.60                                                                          |
| J15          | F   | J         | NPC1 | c.2800C>T (p.R934X )     | ND                       | 10.30             | 9                                                             | 84                                      | 9.00                                          | 9.00                                      |                                              | 9.00                     | 9.41                              | 0.41                                                                          |
| J16          | F   | J         | NPC1 | c.2800C>T (p.R934X )     | ND                       | 13.50             | 18                                                            | 84                                      | 8.00                                          | 11.00                                     |                                              | 11.00                    | 12.00                             | 4.00                                                                          |
| J20          | M   | J         | NPC1 | c.1421C>T (p.P474L)      | c.1421C>T (p.P474L)      | 18.83             | 0                                                             | 84                                      | 6.00                                          | 6.00                                      |                                              | 13.00                    | 17.83                             | 11.83                                                                         |
| LI05         | F   | LI        | NPC1 | c.3493G>A(p.V1165M)      | ND                       | 9.75              | 0                                                             | 48                                      | 4.00                                          |                                           |                                              | 9.00                     | 9.25                              | 5.25                                                                          |
| LI08         | F   | LI        | NPC1 | c.3019C>G (p.P1007A)     | c.3614C>A (p.T1205K)     | 7.75              | 0                                                             | 60                                      | 2.50                                          | 0.01                                      |                                              | 7.50                     | 7.75                              | 5.25                                                                          |
| LI09         | F   | LI        | NPC1 | c.3182 T >C (I1061T)     | c.2762A>C (p.Q921P)      | 11.00             | 18                                                            | 84                                      | 3.00                                          | 0.20                                      |                                              | 0.25                     | 9.58                              | 6.58                                                                          |
| LI17         | F   | LI        | NPC1 | c.2829C>G (p.I943M)      | ND                       | 11.40             | 6                                                             | 76                                      | 4.00                                          | 0.08                                      |                                              | 10.60                    | 10.91                             | 6.91                                                                          |
| LI21         | M   | LI        | NPC1 | c.2339T>G (p.V780G)      | c.2762A>C (p.Q921P )     | 3.10              | 0                                                             | 66                                      | 2.00                                          | 0.01                                      |                                              | 2.80                     | 3.00                              | 1.00                                                                          |
| LI25         | F   | LI        | NPC1 | c.2662C>T (p.P888S)      | c.2761C>T (p.Q921X)      | 15.66             | 0                                                             | 66                                      | 4.00                                          | 0.01                                      |                                              | 10.00                    | 16.70                             | 12.70                                                                         |
| EI22         | M   | EI        | NPC2 | c.58G>T (E20X)           | c.58G>T (E20X)           | 2.66              | 21                                                            | 96                                      | 0.25                                          | 0.01                                      |                                              | 0.66                     | 0.91                              | 0.66                                                                          |
| EI24         | M   | EI        | NPC1 | c.852delT (p.F284LfsX25) | c.852delT (p.F284LfsX25) | 2.75              | 0                                                             | 48                                      | 2.00                                          | 0.01                                      |                                              | 2.60                     | 2.75                              | 0.75                                                                          |
| V14          | F   | NA        | NPC1 | c.3056A>G (p.Y1019C)     | c.3056A>G (p.Y1019C)     | 2.33              | 22                                                            | 84                                      | absent                                        | 0.01                                      |                                              | 0.6                      | 0.6                               | 0.00                                                                          |
| V23          | M   | NA        | NPC1 | c.3019C>G (p.P1007A)     | c.3614C>A (p.T1205K)     | 1.58              | 0                                                             | 60                                      | absent                                        | 0.08                                      |                                              | 1.30                     | 1.60                              | 0.00                                                                          |

A= adult; J = Juvenile; LI = Late Infantile; EI = early infantile; V = visceral; ND = not detected
