# Supplementary material for: Long term follow-up to evaluate the efficacy of miglustat treatment in Italian patients with Niemann-Pick disease type C
Source: Springer Nature journal article supplement (doi:10.1186/s13023-015-0240-y), 2015-02-26
Supplement: MOESM2 [file 9776058]

**Additional file 2. Severity rating scale of neurological manifestations and dysphagia**

| <b>GAIT ABNORMALITIES</b>                         | <b>DEFINITION</b>                                                                                                                                                                                                                                                                                                                                                                                                                                                | <b>Original score</b> | <b>Modified score</b> | <b>DYSMETRIA</b>                   | <b>DEFINITION</b>                                                                                                              | <b>Original score</b> | <b>Modified score</b> |
|---------------------------------------------------|------------------------------------------------------------------------------------------------------------------------------------------------------------------------------------------------------------------------------------------------------------------------------------------------------------------------------------------------------------------------------------------------------------------------------------------------------------------|-----------------------|-----------------------|------------------------------------|--------------------------------------------------------------------------------------------------------------------------------|-----------------------|-----------------------|
| Absence of abnormalities                          | Normal ambulation                                                                                                                                                                                                                                                                                                                                                                                                                                                | 0                     | 0                     | Absence of abnormalities           | Normal                                                                                                                         | 0                     | 0                     |
| Mild abnormalities                                | Autonomous ataxic gait                                                                                                                                                                                                                                                                                                                                                                                                                                           | 1                     | 0.33                  | Mild abnormalities                 | Mild difficulties in reaching the nose or an object                                                                            | 1                     | 0.33                  |
| Moderate abnormalities                            | Assisted ambulation                                                                                                                                                                                                                                                                                                                                                                                                                                              | 2                     | 0.67                  | Moderate abnormalities             | Moderate difficulties in reaching the nose or an object                                                                        | 2                     | 0.67                  |
| Severe/ invalidating abnormalities                | Wheelchair bound                                                                                                                                                                                                                                                                                                                                                                                                                                                 | 3                     | 1                     | Severe/ invalidating abnormalities | Severe dysmetria, preventing the patient from reaching nose or an object                                                       | 3                     | 1                     |
| <b>DYSTONIA</b>                                   | <b>DEFINITION</b>                                                                                                                                                                                                                                                                                                                                                                                                                                                | <b>Original score</b> | <b>Modified score</b> | <b>DYSARTHRIA</b>                  | <b>DEFINITION</b>                                                                                                              | <b>Original score</b> | <b>Modified score</b> |
| Absence of abnormalities                          | Normal                                                                                                                                                                                                                                                                                                                                                                                                                                                           | 0                     | 0                     | Absence of abnormalities           | Normal language                                                                                                                | 0                     | 0                     |
| Mild abnormalities                                | Slight dystonia, only with actions, not disabling/interfering with activities                                                                                                                                                                                                                                                                                                                                                                                    | 1                     | 0.33                  | Mild abnormalities                 | Understandable language                                                                                                        | 1                     | 0.33                  |
| Moderate abnormalities                            | Dystonia on action of distant part of body or intermittently at rest, interfering with normal activities and causing moderate impairment of function                                                                                                                                                                                                                                                                                                             | 2                     | 0.67                  | Moderate abnormalities             | Poor comprehensive language                                                                                                    | 2                     | 0.67                  |
| Severe / invalidating abnormalities               | Severe dystonic movements present at rest and/or causing complete impairment of function                                                                                                                                                                                                                                                                                                                                                                         | 3                     | 1                     | Severe/ invalidating abnormalities | Non verbal communication /anarthria                                                                                            | 3                     | 1                     |
| <b>DEVELOPMENTAL DELAY/ COGNITIVE IMPAIRMENT</b>  | <b>DEFINITION</b>                                                                                                                                                                                                                                                                                                                                                                                                                                                | <b>Original score</b> | <b>Modified score</b> | <b>DYSPHAGIA</b>                   | <b>DEFINITION</b>                                                                                                              | <b>Original score</b> | <b>Modified score</b> |
| Absence of cognitive impairment/psychomotor delay | Qualitative assessment reveals acquisition of normal milestones of psychomotor development or the patient is self-sufficient without any support. Alternatively, IQ higher than 70 with two subcategories as follows:<br>- Absent intellectual disability: IQ higher than 84<br>- Borderline intellectual disability: IQ between 70 and 84.                                                                                                                      | 0                     | 0                     | Normal swallowing                  | Absence of difficulty to swallow                                                                                               | 0                     | 0                     |
| Mild cognitive impairment/psychomotor delay       | Qualitative assessment reveals mild delay in acquisition of psychomotor development milestones or the patient is fairly self-sufficient with minimal/intermittent support and has communication skills. Alternatively, IQ between 50 and 69                                                                                                                                                                                                                      | 1                     | 0.33                  | Mild difficulty to swallow         | Long feeding times, difficulty in chewing                                                                                      | 1                     | 0.25                  |
| Moderate cognitive impairment/psychomotor delay   | Qualitative assessment reveals moderate delay in acquisition of psychomotor development milestones or the patient is able of self-care tasks with limited/moderate support and has some communication skills. Alternatively, IQ between 35 and 49                                                                                                                                                                                                                | 2                     | 0.67                  | Moderate difficulty                | Arching or stiffening of the neck during feeding, gurgly, hoarse, or breathy voice quality                                     | 2                     | 0.50                  |
| Severe cognitive impairment/psychomotor delay     | Qualitative assessment reveals severe delay in acquisition of psychomotor development milestones or the patient is able / completely unable of very basic self-care skills with extensive or pervasive support and/or is able / completely unable of very basic communication skills. Alternatively, IQ below 35 with two subcategories as follows:<br>- Severe intellectual disability: IQ between 20 and 34<br>- Profound intellectual disability: IQ below 20 | 3                     | 1                     | Severe difficulty                  | Excessive drooling or food/liquid coming out of the mouth or nose, coughing or gagging during meals, difficulty breast feeding | 3                     | 0.75                  |
|                                                   |                                                                                                                                                                                                                                                                                                                                                                                                                                                                  |                       |                       | Unable to swallow                  | Refusing liquid or food of different texture, Nasogastric tube or gastric button feeding (PEG)                                 | 4                     | 1                     |
