# Supplementary material for: Long term follow-up to evaluate the efficacy of miglustat treatment in Italian patients with Niemann-Pick disease type C
Source: Springer Nature journal article supplement (doi:10.1186/s13023-015-0240-y), 2015-02-26

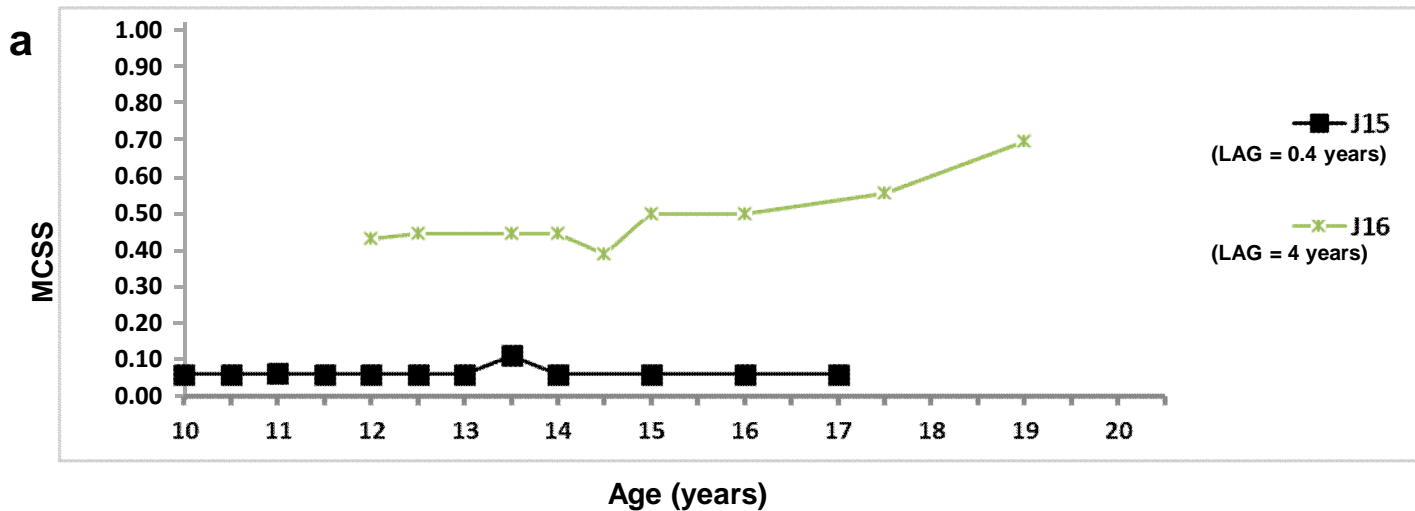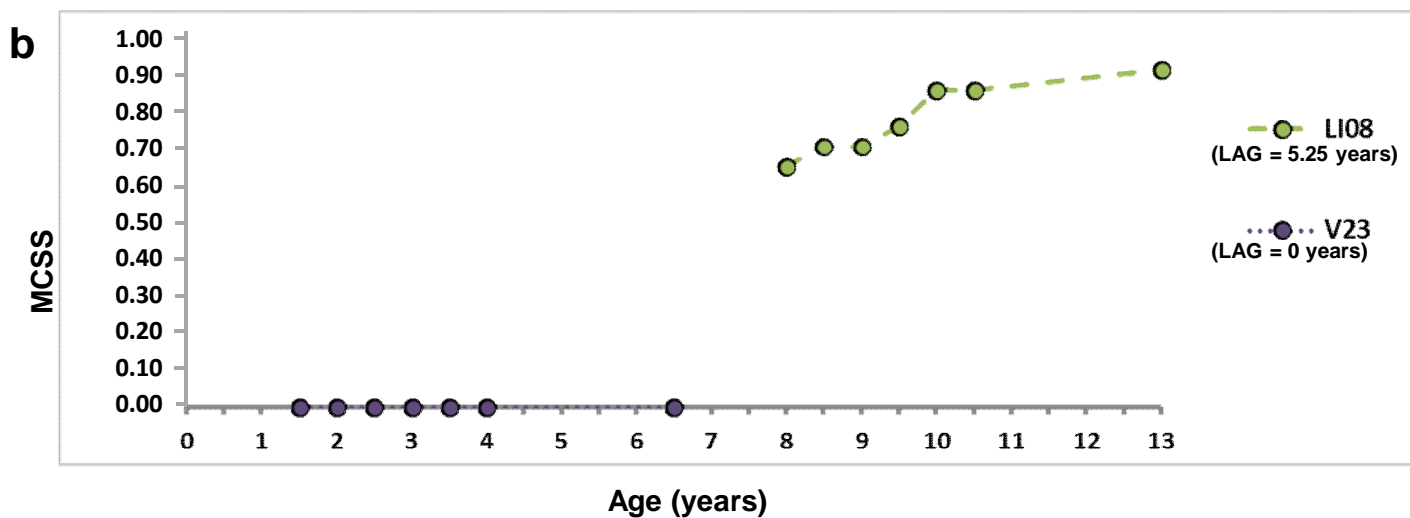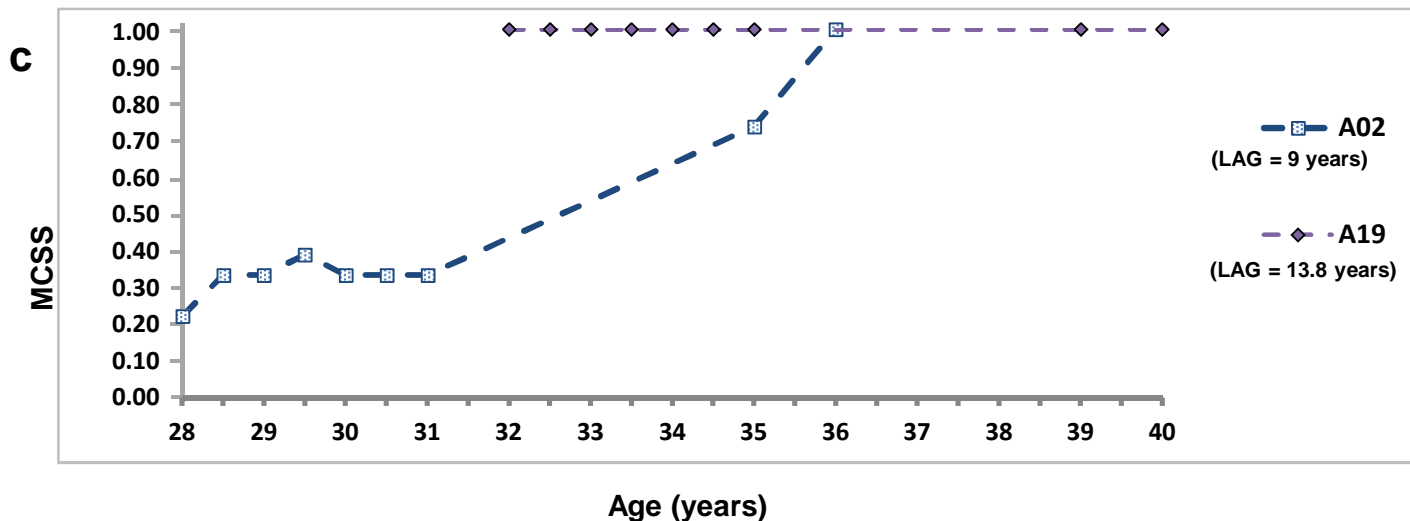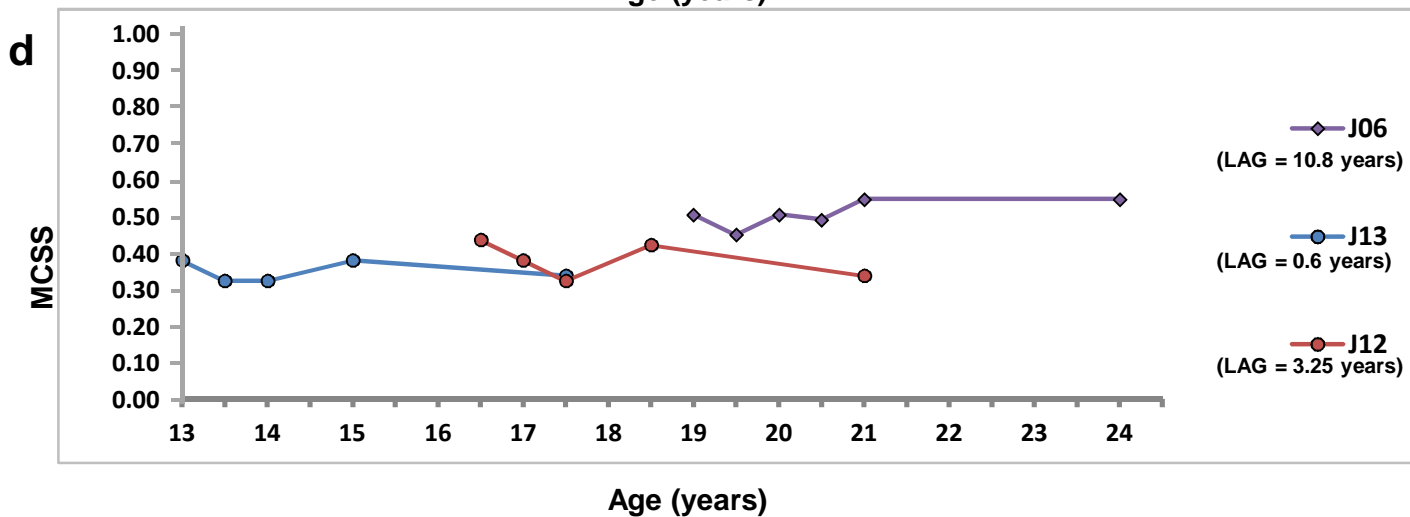

Supplement: MOESM5 [file 9776058]
